# Supplementary material for: An ultra-dense integrated linkage map for hexaploid chrysanthemum enables multi-allelic QTL analysis
Source: PubMed Central journal article supplement (PMC5668331; doi:10.1007/s00122-017-2974-5), 2017-08-29

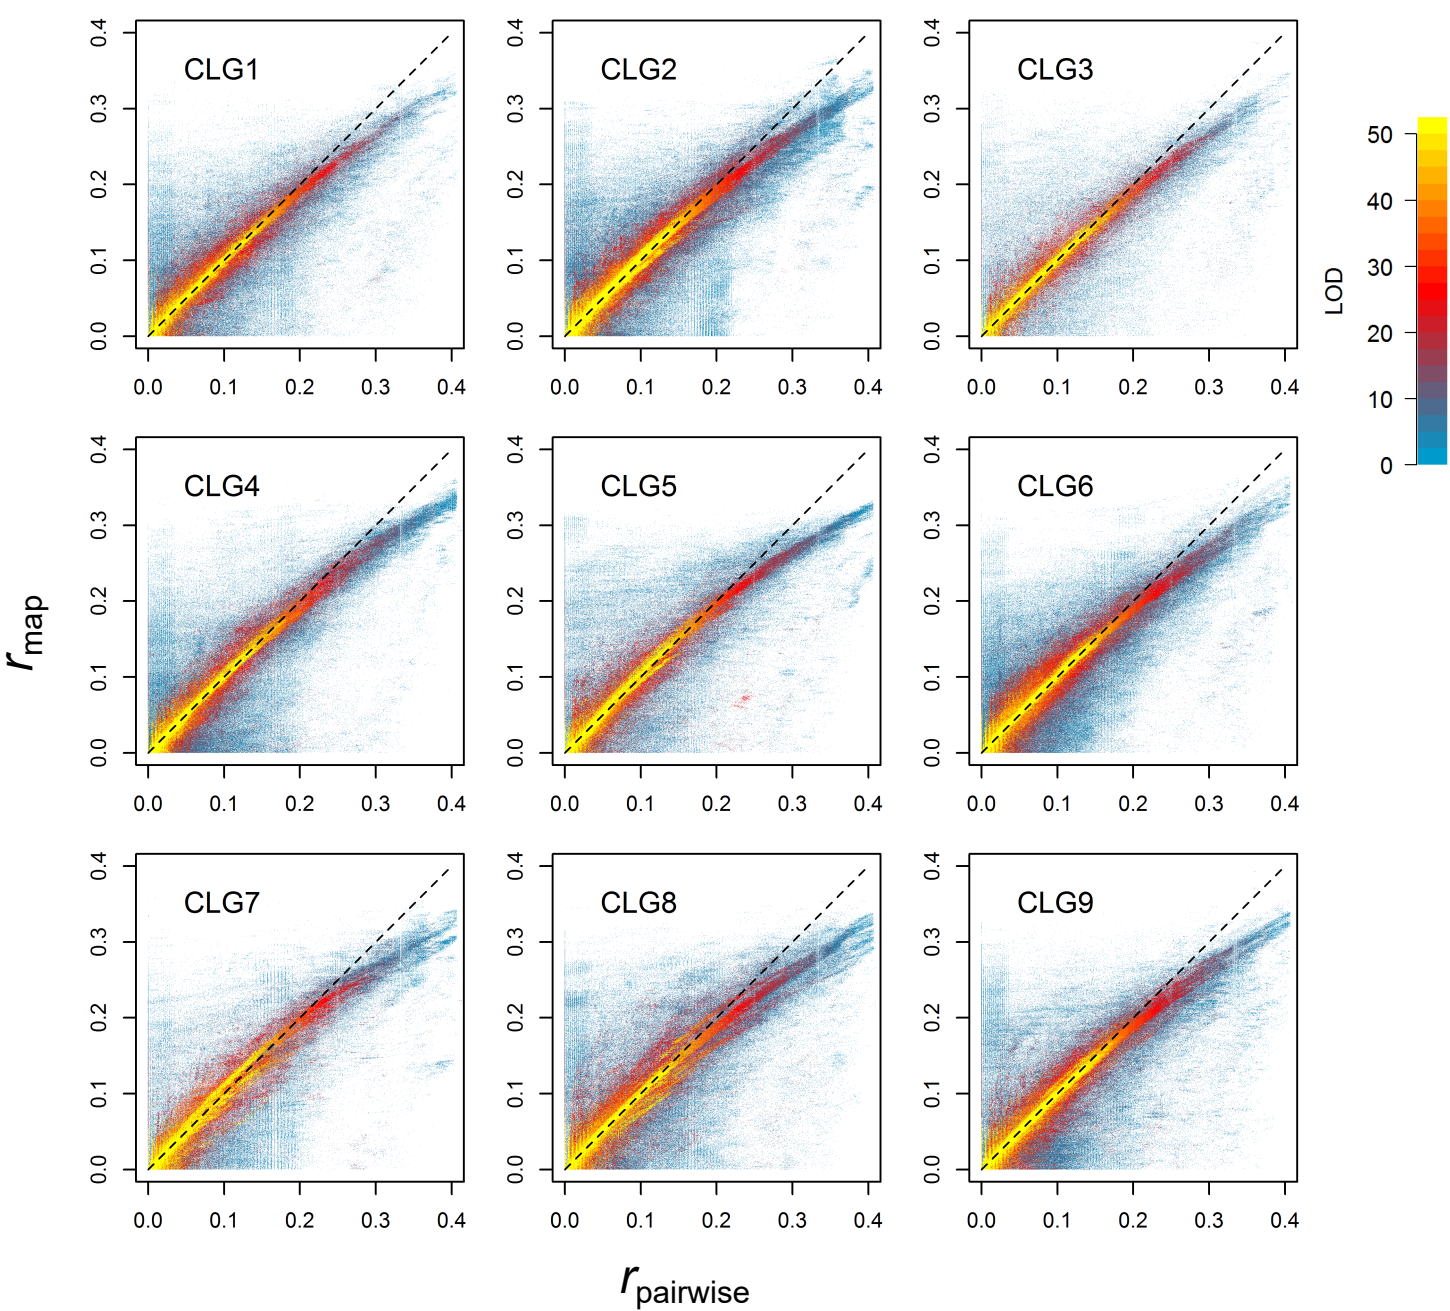

Supplement: 122_2017_2974_MOESM9_ESM.pdf [file 122_2017_2974_MOESM9_ESM.pdf]
