# Supplementary material for: An ultra-dense integrated linkage map for hexaploid chrysanthemum enables multi-allelic QTL analysis
Source: PubMed Central journal article supplement (PMC5668331; doi:10.1007/s00122-017-2974-5), 2017-08-29

# Flower color at CLG5

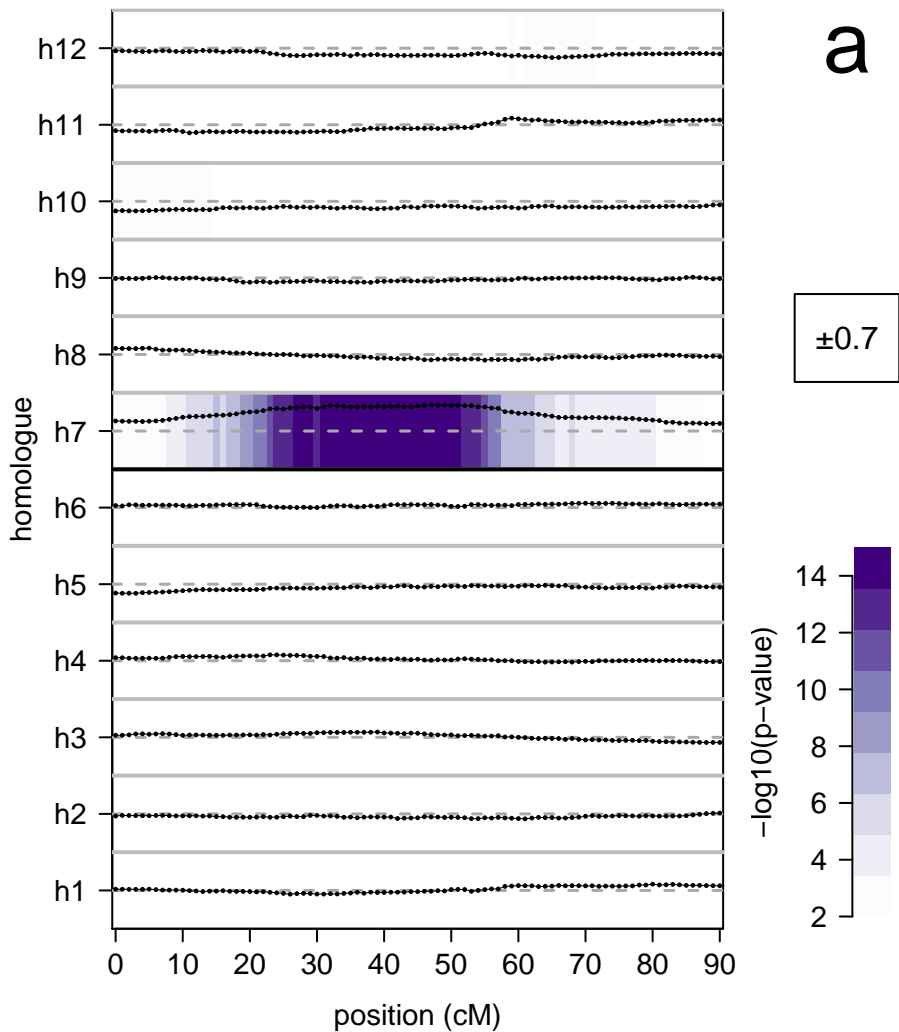



# Flowering time at CLG3

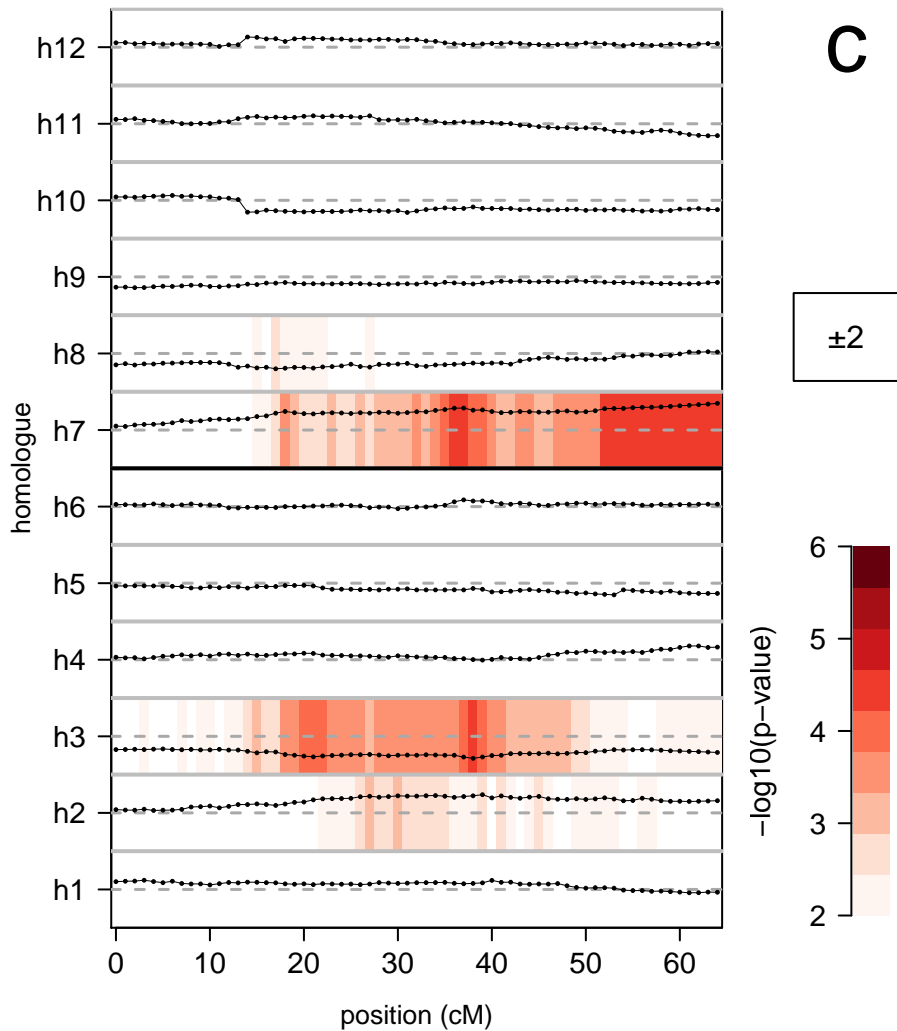

# Flowering time at CLG4

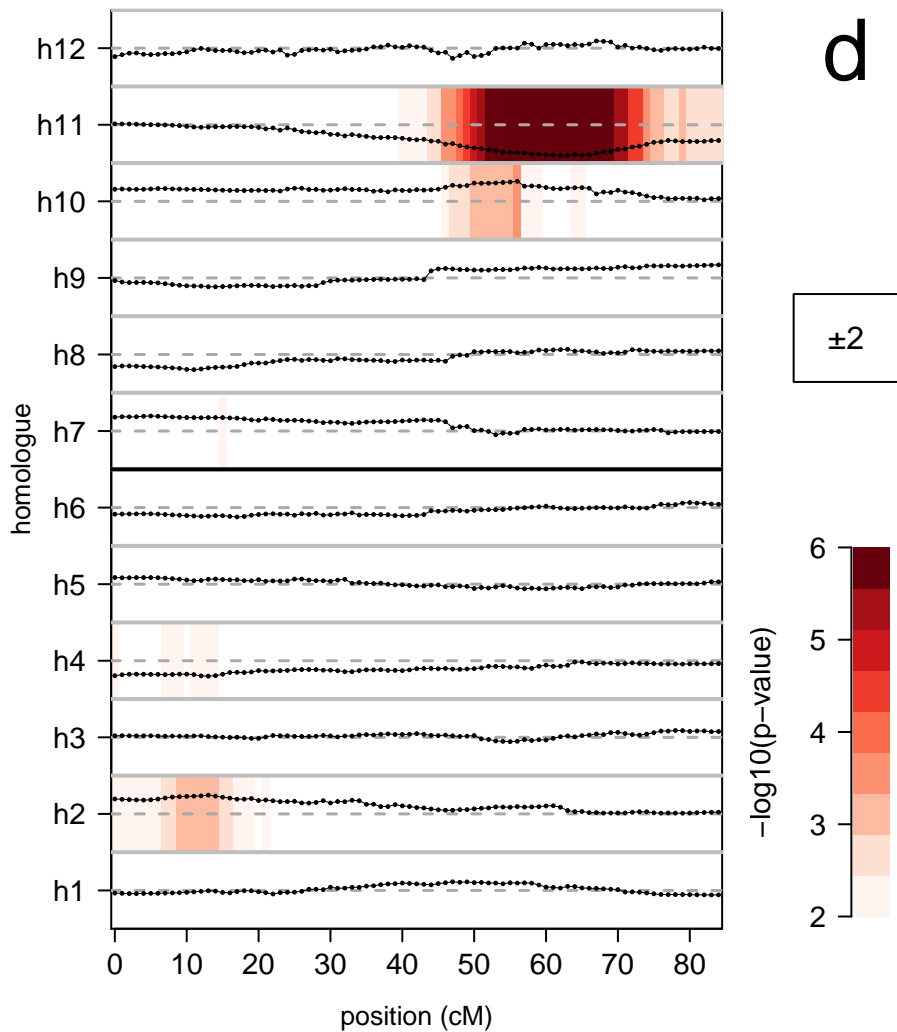

# Flowering time at CLG8

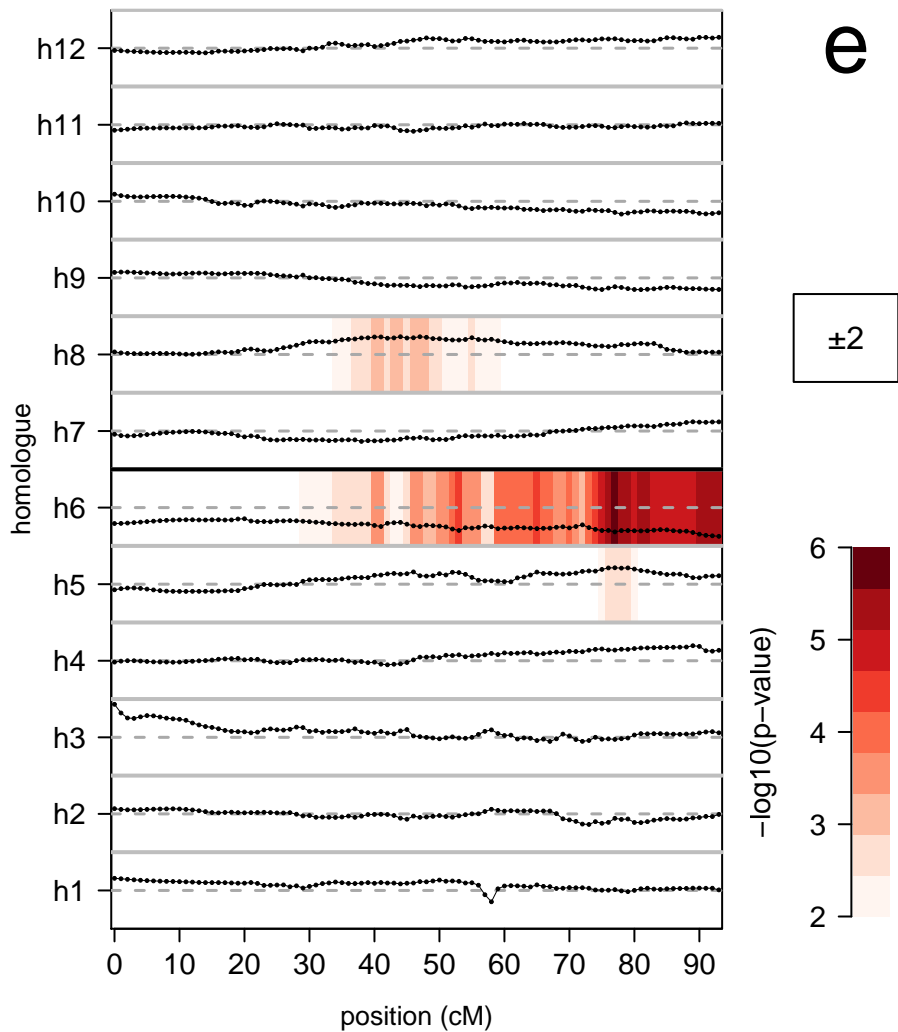

# Disk floret degreening at CLG5

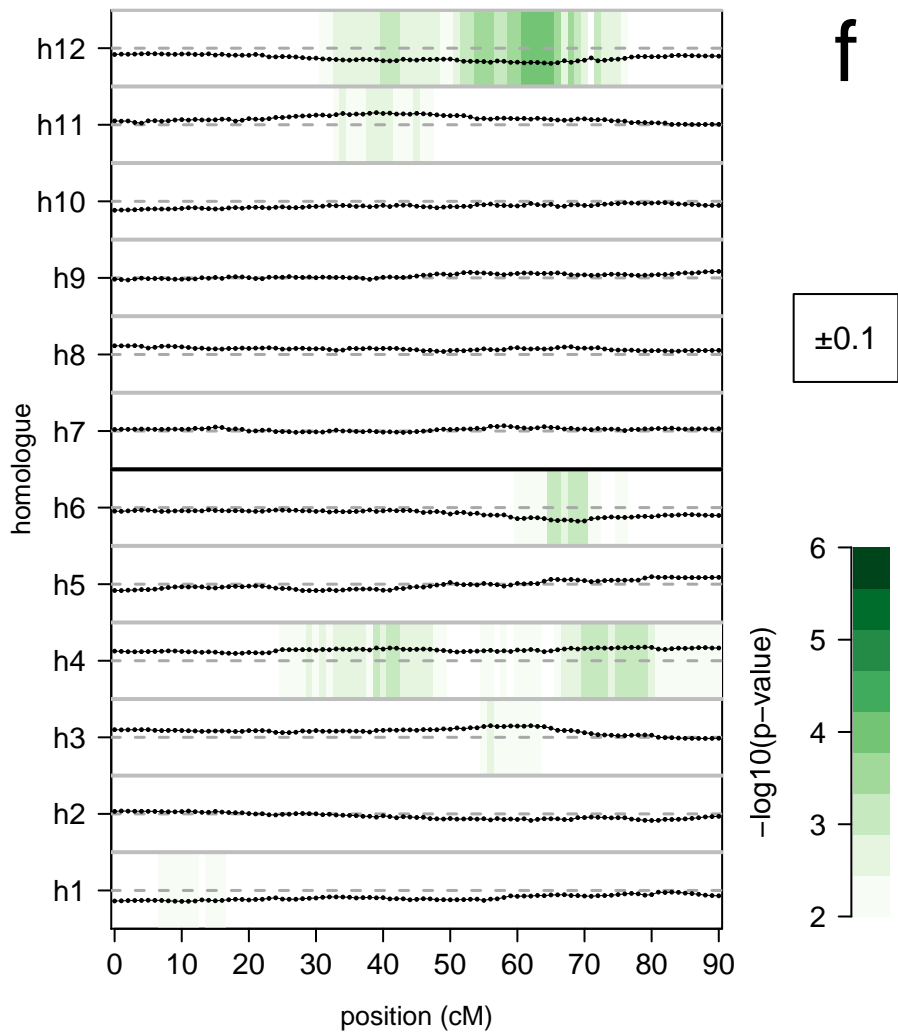

# Disk floret degreening at CLG7

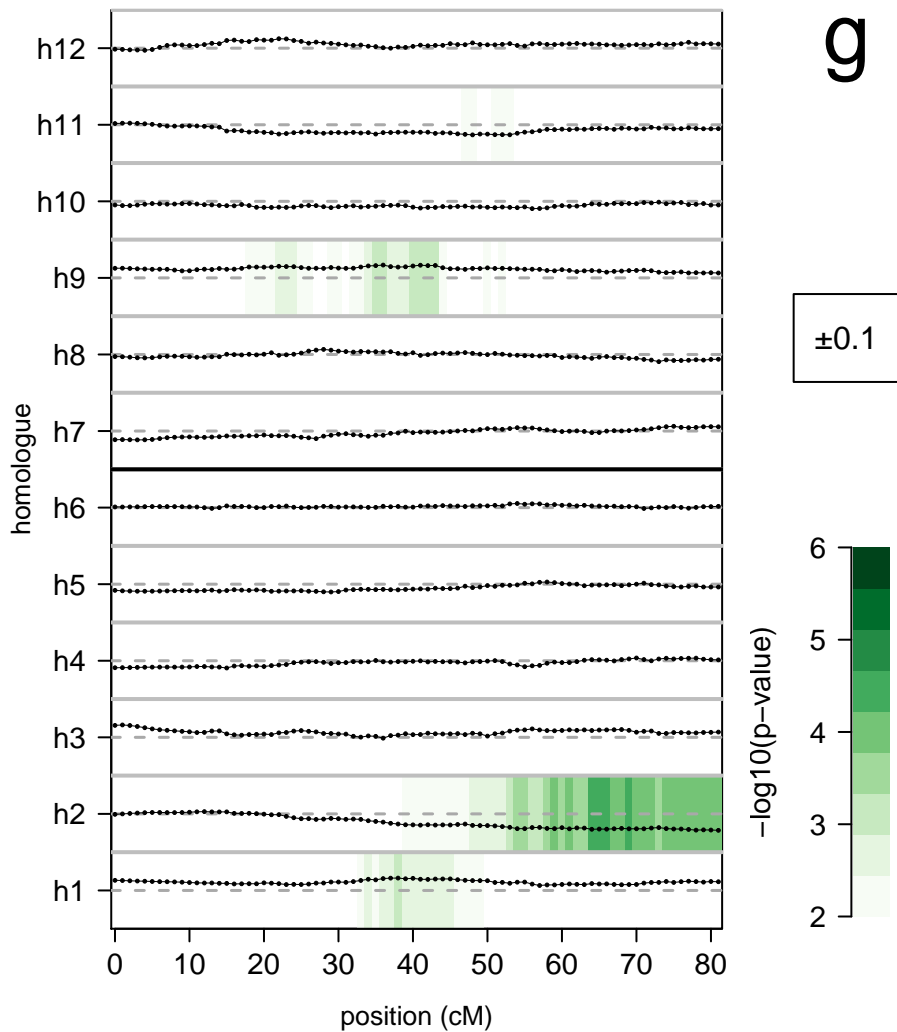

# Number of ray florets at CLG7

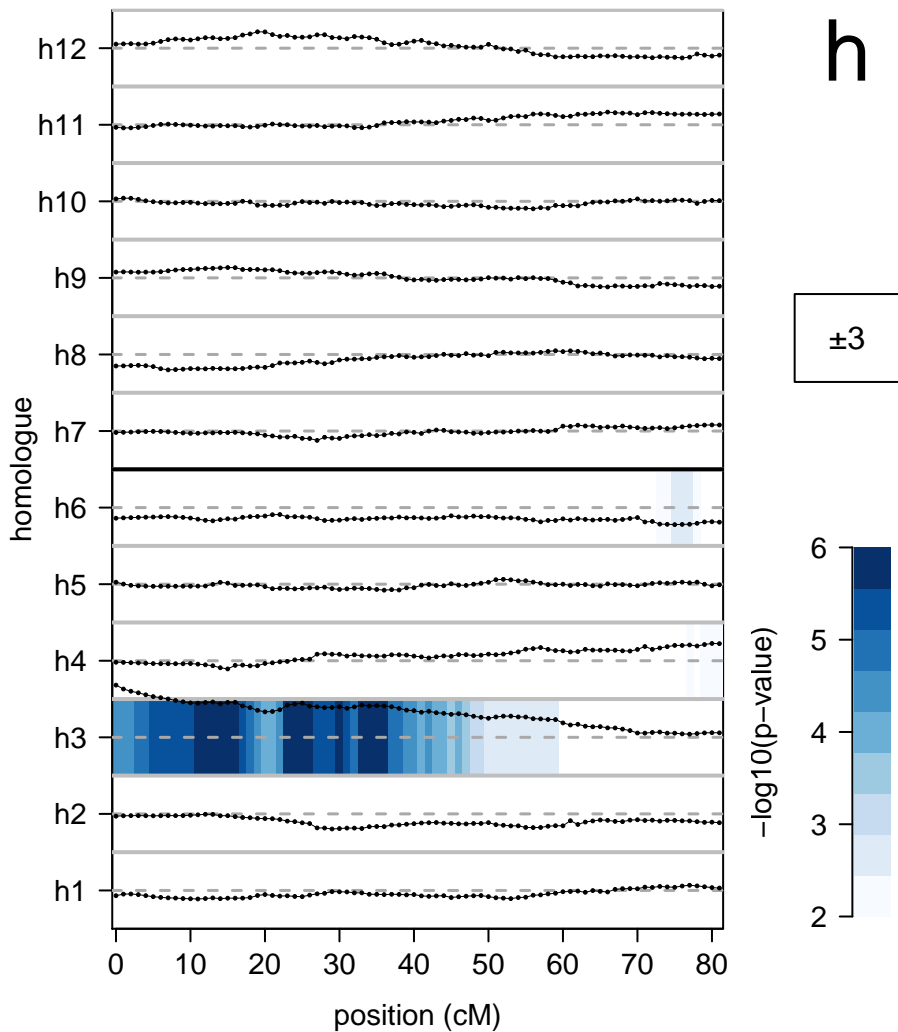

Supplement: 122_2017_2974_MOESM13_ESM.pdf [file 122_2017_2974_MOESM13_ESM.pdf]
